# Supplementary material for: Assessing the Potential Interactions between Cellular miRNA and Arboviral Genomic RNA in the Yellow Fever Mosquito, Aedes aegypti
Source: MDPI journal article supplement (doi:10.3390/v11060540), 2019-06-10
Supplement: s1 [file s1]

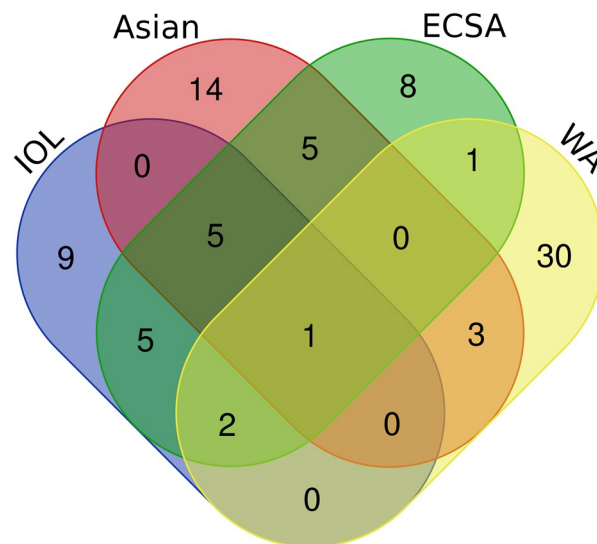

**Supplementary Figure 1.** Venn-diagram presentation of common prediction binding sites on CHIKV negative sense RNA genome of each genotype/lineage. miRNAs that were sorted by the conservation of target sites, might show a more general miRNA-vRNA interaction. IOL, Indian Ocean Lineage, AM258992; WA, West African, HM045816; Asian, EU703762; ECSA, East/Central/South African, HM045811.
