# Supplementary material for: Assessing the Potential Interactions between Cellular miRNA and Arboviral Genomic RNA in the Yellow Fever Mosquito, Aedes aegypti
Source: MDPI journal article supplement (doi:10.3390/v11060540), 2019-06-10
Supplement: s1 [file s1]

**Supplementary Table 2 Most common miRNA sites targeting each genotype of negative-sense CHIKV RNA genome.**

| miRNAs                     | virus genotypes | binding regions<br>(negative sense) | sequences                    | MFE (kcal/mol,<br>miRanda) |
|----------------------------|-----------------|-------------------------------------|------------------------------|----------------------------|
| aae-miR-263a-3p            | IOL             | NS1                                 | UUUAUAGCUAGAUGCGAGAACGC      | -18.42                     |
|                            | Asian           |                                     | UUUAUGGCUAGAUGCGAGAACGC      | -18.59                     |
|                            | ECSA            |                                     | UUUAUAGCUAGAUGCGAGAACGC      | -18.42                     |
| aae-miR-278-3p             | IOL             | E2                                  | CUACUGUCAGUGAAUCCCACCG       | -19.82                     |
|                            | Asian           |                                     | UACCAUCAGUGAACCCACCG         | -18.11                     |
|                            | ECSA            |                                     | CUACUGUCAGUGAAUCCCACCG       | -19.82                     |
| aae-miR-282-5p             | IOL             | NS1                                 | CUGCUCUAUUAGUUUUAUAGCUAGAU   | -11.32                     |
|                            | Asian           |                                     | CUGCUCUAUUAGUUUUAUGGCUAGAU   | -11.32                     |
|                            | ECSA            |                                     | CUGCUCUAUUAGUUUUAUAGCUAGAU   | -11.32                     |
|                            | WA              |                                     | CUGCUCUAUUAGUUUUAUAGCUAGAU   | -11.32                     |
| aae-miR-308-3p             | IOL             | E2                                  | UGGCCAUUGACUGUGAU            | -9.75                      |
|                            | Asian           |                                     | CUGACUAUUGACUGUGAU           | -11.28                     |
|                            | ECSA            |                                     | UGGCCGUUGACUGUGAU            | -9.75                      |
| aae-miR-79-3p              | IOL             | E2                                  | UAAGUAUGGUCUUGUGGCUUU        | -14.57                     |
|                            | ECSA            |                                     | UAAGUAUGGUCUUGUGGCUUU        | -14.57                     |
|                            | WA              |                                     | UAGAUUGGUCUUGUGGCUUU         | -14.57                     |
| aae-miR-996-5p             | IOL             | NS3                                 | CCCACCUGCCCUGUCUAGUC         | -13.85                     |
|                            | Asian           |                                     | CCCACCUGCCCUGUCUAGUC         | -13.85                     |
|                            | ECSA            |                                     | CCCACCUGCCCUGUCUAGUC         | -13.85                     |
| aae-miR-iab-4-3p           | IOL             | 3'UTR                               | AAUGUGUCUCUUAGGGGACACGUAUACC | -20.15                     |
|                            | ECSA            |                                     | AAUGUGUCUCUUAGGGGACACGUAUACC | -20.15                     |
|                            | WA              |                                     | AAUGUGUCUCUUAGGGGACACGUAUACC | -20.15                     |
| aae-miR-new17 <sup>1</sup> | IOL             | NS2                                 | UCGUAGACGUACUCGUGUUCUGU      | -21.63                     |
|                            | Asian           |                                     | UCGUAGACGUACUCGUGUUCUGU      | -22.41                     |
|                            | ECSA            |                                     | UCGUAGACGUACUCGUGUUCUGU      | -21.63                     |

1 Hu, W., Criscione, F., Liang, S. & Tu, Z. MicroRNAs of two medically important mosquito species: *Aedes aegypti* and *Anopheles stephensi*. *Insect Mol Biol* **24**, 240-252, doi:10.1111/imb.12152 (2015).
