# Supplementary material for: Assessing the Potential Interactions between Cellular miRNA and Arboviral Genomic RNA in the Yellow Fever Mosquito, Aedes aegypti
Source: MDPI journal article supplement (doi:10.3390/v11060540), 2019-06-10
Supplement: s1 [file s1]

Assessing the potential interactions between cellular miRNA and arboviral genomic RNA in the Yellow Fever mosquito, *Aedes aegypti*  
Pei-Shi YEN<sup>a</sup>, Chun-Hong CHEN<sup>b</sup>, Vattipally SREENU<sup>c</sup>, Alain KOHL<sup>c</sup> and Anna-Bella FAILLOUX<sup>a</sup>

Supplementary Table 1 Most common miRNA sites targeting each genotype of CHIKV, DENV1-4, and ZIKV.

| miRNAs        | viruses | virus genotypes | binding regions | sequences                   | MFE (kcal/mol, miRanda) | Regulation/Description                                                                                                                                                                                                         |
|---------------|---------|-----------------|-----------------|-----------------------------|-------------------------|--------------------------------------------------------------------------------------------------------------------------------------------------------------------------------------------------------------------------------|
| aae-miR-1-3p  | DENV-1  | I               | Capsid          | UUUCAUAGCAUUCCUAAACAUUUC    | -13.06                  | <ul style="list-style-type: none"><li>Upregulated in female fat body at 24 post-blood meal<sup>89</sup></li><li>Significantly enriched at 14 days post-infection in ZIKV-infected mosquitoes<sup>29</sup></li></ul>            |
|               |         |                 | NS3             | AGACGAGGAAAGAGACAUUCC       | -9.86                   |                                                                                                                                                                                                                                |
|               |         | II              | NS3             | AGAUGAGGAAAGAGACAUUCC       | -8.99                   |                                                                                                                                                                                                                                |
|               |         |                 | Capsid          | GGUGAUGGCUUUUUAUAGCAUUCC    | -12.26                  |                                                                                                                                                                                                                                |
|               |         | III             | NS3             | AGAUGAGGAAAGAGACAUUCC       | -8.99                   |                                                                                                                                                                                                                                |
|               |         |                 | Capsid          | GGUGAUGGCUUUUUAUAGCAUUCC    | -12.26                  |                                                                                                                                                                                                                                |
|               |         | IV              | NS3             | AGAUGAGGAAAGAGACAUUCC       | -8.99                   |                                                                                                                                                                                                                                |
|               |         |                 | Capsid          | GGUGAUGGCUUUUUAUAGCAUUCC    | -12.26                  |                                                                                                                                                                                                                                |
|               |         | V               | NS3             | AGAUGAGGAAAGAGACAUUCC       | -8.99                   |                                                                                                                                                                                                                                |
|               | DENV-2  | Asian-II        | NS2B            | CAGUUCACUUCUAAAGAAUGACAUUCC | -13.73                  |                                                                                                                                                                                                                                |
|               |         | American        | E               | AGGUUUGUCUGCAAACAUUCC       | -12.96                  |                                                                                                                                                                                                                                |
|               | DENV-4  | I               | NS5             | AAAGGUGAGGAAAGACAUUCC       | -11.89                  |                                                                                                                                                                                                                                |
|               |         | II              | NS5             | AAAGGUGAGGAAAGACAUUCC       | -11.89                  |                                                                                                                                                                                                                                |
|               |         | III             | NS5             | AAAAGUAAGGAAAGACAUUCC       | -11.6                   |                                                                                                                                                                                                                                |
| aae-miR-11-5p | CHIKV   | IOL             | 26S RNA UTR     | AUCAGCUACAAUGGAGUUC         | -18.84                  | <ul style="list-style-type: none"><li>Detectable during all developmental stages<sup>90</sup></li><li>Upregulated in the midgut after blood meal<sup>91</sup></li><li><i>Wolbachia</i>-suppressed miRNA<sup>92</sup></li></ul> |
|               |         | ECSA            | 26S RNA UTR     | AUCAGCUACAAUGGAGUUC         | -18.84                  |                                                                                                                                                                                                                                |
|               | DENV-1  | I               | NS1             | CACUCUAUGGAGCAAUGGAGUUC     | -19.64                  |                                                                                                                                                                                                                                |
|               |         |                 | NS4B            | AGAUGGAUUAUGGAGUUC          | -13.28                  |                                                                                                                                                                                                                                |
|               |         | II              | NS1             | CACUCUAUGGAGCAAUGGAGUUC     | -19.64                  |                                                                                                                                                                                                                                |
|               |         |                 | NS4A            | CCUCCAUCAUACUGGAGUUC        | -22.08                  |                                                                                                                                                                                                                                |
|               |         |                 | NS4B            | AGAUGGACAUAGGAGUUC          | -14.12                  |                                                                                                                                                                                                                                |
|               |         | IV              | NS4B            | AGAUGGACAUAGGAGUUC          | -14.12                  |                                                                                                                                                                                                                                |
|               |         | V               | NS4B            | AGAUGGACAUAGGAGUUC          | -14.12                  |                                                                                                                                                                                                                                |

|                 |        |                |       |                           |        |                                                                                                                                               |
|-----------------|--------|----------------|-------|---------------------------|--------|-----------------------------------------------------------------------------------------------------------------------------------------------|
|                 | DENV-2 | Asian-II       | NS5   | GAGAAGAAGCUAGGGGAGUUC     | -13.41 |                                                                                                                                               |
|                 |        | American       | NS4A  | CUUCAAUAAUUAUUGGAGUUC     | -15.89 |                                                                                                                                               |
|                 | DENV-3 | II             | NS2A  | AACACAUGAUUGCAGGGGUUC     | -18.19 |                                                                                                                                               |
|                 |        | V              | NS2A  | AACACAUGAUUGCAGGGGUUC     | -18.19 |                                                                                                                                               |
|                 | DENV-4 | I              | NS5   | CUCAUUUCGAGAGUGAAGGAGUUC  | -18.12 |                                                                                                                                               |
|                 |        | II             | E     | UUCAGGAAAGGGAGUUC         | -17.03 |                                                                                                                                               |
|                 |        |                | NS5   | CUUCAGAGAGUGAAGGAGUUC     | -18.25 |                                                                                                                                               |
|                 | ZIKV   | EA             | NS1   | UCCUAGAGGAGAAUGGAGUUC     | -16.41 |                                                                                                                                               |
| aac-miR-124-3p  | DENV-1 | II             | NS5   | UGAUUGGCAACAAGUGCCUU      | -14.07 | • Detectable during the larval stage <sup>90</sup>                                                                                            |
|                 |        | IV             | NS5   | CGAUUGGCAACAAGUGCCUU      | -14.07 |                                                                                                                                               |
|                 | DENV-2 | Asian American | NS5   | CGAUUGGACACAAGUGCCUU      | -16.29 |                                                                                                                                               |
|                 | DENV-3 | I              | NS4A  | AAAUAGGAAGAGUGCCUU        | -10.41 |                                                                                                                                               |
|                 |        | II             | NS4A  | AAAUAGGAAGAGUGCCUU        | -10.41 |                                                                                                                                               |
|                 |        | III            | NS4A  | AAAUAGGAAGAGUGCCUU        | -10.41 |                                                                                                                                               |
|                 |        | V              | NS4A  | AAAUAGGAAGAGUGCCUU        | -10.41 |                                                                                                                                               |
| aac-miR-219-5p  | DENV-1 | IV             | E     | AUGAGAUGGUGUUGUUGACAAUG   | -15.76 | • <i>Wolbachia</i> induced miRNA in <i>Ae. aegypti</i> Aag2 cells <sup>92</sup><br>• Detectable during all developmental stages <sup>90</sup> |
|                 | DENV-2 | Asian-I        | NS2A  | AUUGGAUACCAUAGCACUGACAAUC | -10.77 |                                                                                                                                               |
|                 |        | Asian-II       | NS3   | GGAAAAAAGCAUUGAAGACAAUC   | -11.9  |                                                                                                                                               |
|                 |        | American       | NS3   | UGAAAAAAGCAUUGAAGACAAUC   | -11.9  |                                                                                                                                               |
|                 |        | Cosmopolitan   | NS3   | CUGAAAAAAACAUUGAAGACAAUC  | -8.93  |                                                                                                                                               |
|                 | DENV-3 | I              | 2K    | AGAGAACUCCCCAAGACAAUC     | -12.56 |                                                                                                                                               |
|                 | DENV-4 | I              | 2K    | CAAAGGACCCCACAAGACAAUC    | -12.61 |                                                                                                                                               |
|                 |        |                | NS5   | AGAAAAACCAGACAUGACAAUC    | -10.25 |                                                                                                                                               |
|                 |        | II             | 2K    | CAAAGGACCCCACAAGACAAUC    | -12.61 |                                                                                                                                               |
|                 |        |                | NS5   | AGAAAAACCAGACAUGACAAUC    | -10.25 |                                                                                                                                               |
|                 |        | III            | NS5   | AGAGAAACCAGACAUGACAAUC    | -12.86 |                                                                                                                                               |
|                 | ZIKV   | WA             | NS4A  | UCAGGAAGCCAUUGACAAUC      | -14.09 |                                                                                                                                               |
| aac-miR-263a-3p | DENV-1 | I              | 3'UTR | AUCAUCCAGGCACAGAACGC      | -18.04 | • Detectable in mosquito cells <sup>92</sup>                                                                                                  |
|                 |        | II             | NS2A  | AAAAUGCUGAUGGUUGGAACAC    | -15.5  |                                                                                                                                               |

|                 |        |                |       |                            |        |                                                                                                                                                                                                                                                                             |
|-----------------|--------|----------------|-------|----------------------------|--------|-----------------------------------------------------------------------------------------------------------------------------------------------------------------------------------------------------------------------------------------------------------------------------|
|                 |        | III            | 3'UTR | AUCAUCCAGGCACAGAACGC       | -18.04 |                                                                                                                                                                                                                                                                             |
|                 |        | IV             | 3'UTR | AUCAUCCAGGCACAGAACGC       | -18.04 |                                                                                                                                                                                                                                                                             |
|                 |        | V              | 3'UTR | AUCAUCCAGGCACAGAACGC       | -18.04 |                                                                                                                                                                                                                                                                             |
|                 | DENV-2 | Asian-I        | 3'UTR | AUCAUCCAGGCACAGAACGC       | -18.04 |                                                                                                                                                                                                                                                                             |
|                 |        | Asian American | 3'UTR | AUCAUCCAGGCACAGAACGC       | -18.04 |                                                                                                                                                                                                                                                                             |
|                 |        | American       | 3'UTR | AUCAUCCAGGCACAGAACGC       | -18.04 |                                                                                                                                                                                                                                                                             |
|                 |        | Cosmopolitan   | 3'UTR | AUCAUCCAGGCACAGAACGC       | -18.04 |                                                                                                                                                                                                                                                                             |
|                 | DENV-3 | II             | NS2B  | AUGAUGAGACUGAGAACAU        | -17.25 |                                                                                                                                                                                                                                                                             |
|                 |        |                | 3'UTR | AUCAUCCAGGCACAGAACGC       | -18.04 |                                                                                                                                                                                                                                                                             |
|                 |        | III            | NS2B  | AUGAUGAGACUGAGAACAU        | -17.25 |                                                                                                                                                                                                                                                                             |
|                 |        |                | 3'UTR | AUCAUCCAGGCACAGAACGC       | -18.04 |                                                                                                                                                                                                                                                                             |
|                 |        | V              | 3'UTR | AUCAUCCAGGCACAGAACGC       | -18.04 |                                                                                                                                                                                                                                                                             |
|                 | DENV-4 | III            | NS2B  | UAUAUGUGGCAAGUGAGAACAC     | -15.62 |                                                                                                                                                                                                                                                                             |
|                 | ZIKV   | WA             | NS5   | GUGGACAAGGAAAGAGAACAC      | -12.13 |                                                                                                                                                                                                                                                                             |
| aac-miR-263a-5p | CHIKV  | IOL            | nsP3  | AAUGCUAUUUGACCACAACGUGCCAU | -15.1  | <ul style="list-style-type: none"> <li>Increased in the saliva of CHIKV-infected mosquitoes at 10 days post-infection<sup>47</sup></li> </ul>                                                                                                                               |
|                 |        | WA             | E2    | UGCAAAAUUGAUCAGUGCCAU      | -16.75 |                                                                                                                                                                                                                                                                             |
|                 |        | Asian          | nsP3  | AUGUUAUUUGAUCACAAUGUGCCAU  | -14.78 |                                                                                                                                                                                                                                                                             |
|                 |        | ECSA           | nsP3  | AAUGCUAUUUGACCACAACGUGCCAU | -15.1  |                                                                                                                                                                                                                                                                             |
|                 | DENV-1 | II             | NS3   | GAGAUAGUUGACCUUAUGUGCCAU   | -13.31 |                                                                                                                                                                                                                                                                             |
|                 | DENV-2 | Cosmopolitan   | NS3   | GAGUGGAACAU AUGUGAGUGCCAU  | -17.18 |                                                                                                                                                                                                                                                                             |
|                 | ZIKV   | EA             | NS3   | UCGUUGAUUUGAUGUGCCAU       | -16.78 |                                                                                                                                                                                                                                                                             |
|                 |        | WA             | NS3   | UCGUCGAUUUGAUGUGCCAU       | -16.78 |                                                                                                                                                                                                                                                                             |
| aac-miR-279-3p  | CHIKV  | IOL            | E1    | AGUACCGUAUAAGACUCUAGUC     | -12.34 | <ul style="list-style-type: none"> <li>Present in embryos, and could be induced in the midgut after blood meal<sup>91</sup></li> <li>In Drosophila, miR-279-3p is involved in the formation of the CO<sub>2</sub> sensory neuron in maxillary palps<sup>93</sup></li> </ul> |
|                 |        | Asian          | E1    | AGUACCGUAUAAGACUCUAGUC     | -12.34 |                                                                                                                                                                                                                                                                             |
|                 |        | ECSA           | E1    | AGUACCGUAUAAGACUCUAGUC     | -12.34 |                                                                                                                                                                                                                                                                             |
|                 | DENV-1 | III            | NS1   | AGAAGGAAGAGAAUCUAGUC       | -14.82 |                                                                                                                                                                                                                                                                             |
|                 |        | V              | NS1   | AGAAGGAGGAGAAUCUAGUC       | -17.52 |                                                                                                                                                                                                                                                                             |
|                 | ZIKV   | Asian          | NS5   | UAGGUGAGUCAUCAUCUAGUC      | -18.35 |                                                                                                                                                                                                                                                                             |
|                 |        | EA             | NS5   | UAGGUGAGUCAUCAUCUAGUC      | -18.35 |                                                                                                                                                                                                                                                                             |

|                |        |                |        |                                |        |                                                                                                                                                           |
|----------------|--------|----------------|--------|--------------------------------|--------|-----------------------------------------------------------------------------------------------------------------------------------------------------------|
| aae-miR-281-3p | CHIKV  | IOL            | nsP1   | GUUCAUGUACAAUGCCAUGGC          | -16.96 | <ul style="list-style-type: none"><li>• Detectable in Aag2 cells<sup>92</sup></li><li>• Upregulated in the midgut after blood meal<sup>91</sup></li></ul> |
|                |        | Asian          | nsP3   | CCUUUGCCGUUAUGCCAUGAC          | -11.74 |                                                                                                                                                           |
|                | DENV-2 | Asian-I        | NS2B   | AAAAAAUGAUAUCCCCAUGAC          | -13.59 |                                                                                                                                                           |
|                |        |                | NS5    | UGUUCACACCAUUUCCAUGAG          | -12.5  |                                                                                                                                                           |
|                |        | Asian-II       | NS2B   | UAAAGAAUGACAUUCCCAUGAC         | -18.78 |                                                                                                                                                           |
|                |        | Asian American | NS2B   | UAAAGAAUGACAUUCCUAUGAC         | -18.78 |                                                                                                                                                           |
|                |        | Cosmopolitan   | NS2B   | UAAAGAAUGAUAUUCCCAUGAC         | -18.7  |                                                                                                                                                           |
|                | DENV-3 | I              | prM    | GCUGGUCACCCCAUCCAUGAC          | -14.86 |                                                                                                                                                           |
|                |        | II             | prM    | GCUGGUCACUCCAUCCAUGAC          | -16.07 |                                                                                                                                                           |
|                |        | III            | prM    | GCUGGUCACCCCAUCCAUGAC          | -14.86 |                                                                                                                                                           |
|                |        | V              | prM    | GCUGGUUACCCCAUCCAUGAC          | -14.86 |                                                                                                                                                           |
|                | DENV-4 | I              | NS2A   | UGGUAAUAGGAAUGGCCAUGAC         | -17.21 |                                                                                                                                                           |
|                |        | II             | E      | GGAACACUUCAAUGGCCAUGAC         | -17.44 |                                                                                                                                                           |
|                |        | II             | NS2A   | UGGUAAUAGGAAUGGCCAUGAC         | -17.21 |                                                                                                                                                           |
|                |        | III            | NS2A   | UGGUGAUAGGAAUGGCCAUGAC         | -18.91 |                                                                                                                                                           |
| aae-miR-282-5p | DENV-1 | I              | Capsid | CCCCCAACAGCAGGAAUUUUGGCUAGAU   | -19.16 | <ul style="list-style-type: none"><li>• The expression profile is not clear</li></ul>                                                                     |
|                |        |                | NS3    | AAGAAAGAAACUACGACCCCGUGGCUAGAU | -16.91 |                                                                                                                                                           |
|                |        | II             | Capsid | CCCCCAACAGCAGGAAUUUUGGCUAGAU   | -19.16 |                                                                                                                                                           |
|                |        |                | E      | GAUUGUUCACCUAGAACAGGGCUAGAU    | -23.42 |                                                                                                                                                           |
|                |        | III            | Capsid | CCCCCAACAGCAGGAAUUUUGGCUAGAU   | -19.16 |                                                                                                                                                           |
|                |        | IV             | Capsid | CCUCCAACAGCAGGAAUUUUGGCUAGAU   | -19.16 |                                                                                                                                                           |
|                |        | V              | Capsid | CCCCCAACAGCAGGAAUUUUGGCUAGAU   | -19.16 |                                                                                                                                                           |
|                | DENV-3 | II             | Capsid | CCACCAACAGCAGGAGUUUUGGCUAGAU   | -23.63 |                                                                                                                                                           |
|                |        | III            | Capsid | CCACCAACAGCAGGAGUCUUGGCUAGAU   | -23.63 |                                                                                                                                                           |
| aae-miR-285-5p | CHIKV  | Asian          | NS3    | AGAGUAAUGACUCGUAGACUGCUAGGU    | -18.21 | <ul style="list-style-type: none"><li>• Detectable in both male and female adults, but rarely observed in the larval stage<sup>90</sup></li></ul>         |
|                |        | IOL            | E1     | GCACUGAUUCUAAUCGUGGUGCU        | -22.74 |                                                                                                                                                           |
|                |        | WA             | E1     | GCCUUAUUUUAAUUGUGGUGCU         | -14.41 |                                                                                                                                                           |
|                |        | ECSA           | E1     | GCACUGAUUCUAAUCGUGGUGCU        | -22.74 |                                                                                                                                                           |
|                | DENV-2 | Cosmopolitan   | NS3    | ACGCAGACAGAAGAUGGUGCU          | -13.33 |                                                                                                                                                           |

|                 |        |       |       |                                |        |                                                                                                                                                                                                                                                                                                                                                                                                                                                                            |
|-----------------|--------|-------|-------|--------------------------------|--------|----------------------------------------------------------------------------------------------------------------------------------------------------------------------------------------------------------------------------------------------------------------------------------------------------------------------------------------------------------------------------------------------------------------------------------------------------------------------------|
|                 | DENV-3 | II    | NS3   | ACACAGAUAGAAAAUGGUGCU          | -15.32 |                                                                                                                                                                                                                                                                                                                                                                                                                                                                            |
|                 | ZIKV   | WA    | NS1   | GGGUCAUAGAGGAAUGGUGCU          | -18.44 |                                                                                                                                                                                                                                                                                                                                                                                                                                                                            |
|                 |        |       | NS3   | ACACAGAUAGAAGAUGGUGCU          | -14.94 |                                                                                                                                                                                                                                                                                                                                                                                                                                                                            |
|                 |        | Asian | NS3   | ACACAGAUAGAAGAUGGUGCU          | -14.94 |                                                                                                                                                                                                                                                                                                                                                                                                                                                                            |
| aae-miR-286a-3p | CHIKV  | ECSA  | E1    | ACGGUGGGAGUACCGUAUAAGACUCUAGUC | -22.09 | <ul style="list-style-type: none"> <li>Significantly reduced at 2 days after ZIKV infection<sup>29</sup></li> <li>Detectable during embryo stage, and less abundant in adults<sup>90,91</sup></li> <li>Ovary specific expressed miRNA <sup>94</sup></li> </ul>                                                                                                                                                                                                             |
|                 | ZIKV   | WA    | 5'UTR | UGGAAACGAGAGUUUCUGGUC          | -23.15 |                                                                                                                                                                                                                                                                                                                                                                                                                                                                            |
|                 |        |       | NS5   | AUGAUCCAAGAUUUUGGGCUCUAGUG     | -13.39 |                                                                                                                                                                                                                                                                                                                                                                                                                                                                            |
|                 |        | Asian | 5'UTR | UGGAAACGAGAGUUUCUGGUC          | -23.15 |                                                                                                                                                                                                                                                                                                                                                                                                                                                                            |
|                 |        |       | NS5   | CAUAGGUGAGUCAUCAUCUAGUC        | -18.44 |                                                                                                                                                                                                                                                                                                                                                                                                                                                                            |
|                 |        | EA    | 5'UTR | UGGAAACGAGAGUUUCUGGUC          | -23.15 |                                                                                                                                                                                                                                                                                                                                                                                                                                                                            |
|                 |        |       | NS5   | CAUAGGUGAGUCAUCAUCUAGUC        | -18.44 |                                                                                                                                                                                                                                                                                                                                                                                                                                                                            |
| aae-miR-286b-3p | CHIKV  | ECSA  | E1    | ACGGUGGGAGUACCGUAUAAGACUCUAGUC | -20.23 | <ul style="list-style-type: none"> <li>Significantly reduced at 7 and 14 days after ZIKV infection<sup>29</sup></li> <li>Ovary specific expressed miRNA <sup>94</sup></li> </ul>                                                                                                                                                                                                                                                                                           |
|                 | DENV-1 | I     | NS2A  | UUCUUACAAUUGGAUUGAGUCUAGUG     | -14.43 |                                                                                                                                                                                                                                                                                                                                                                                                                                                                            |
|                 | ZIKV   | WA    | 5'UTR | UGGAAACGAGAGUUUCUGGUC          | -24.83 |                                                                                                                                                                                                                                                                                                                                                                                                                                                                            |
|                 |        | Asian | 5'UTR | UGGAAACGAGAGUUUCUGGUC          | -24.83 |                                                                                                                                                                                                                                                                                                                                                                                                                                                                            |
|                 |        | EA    | 5'UTR | UGGAAACGAGAGUUUCUGGUC          | -24.83 |                                                                                                                                                                                                                                                                                                                                                                                                                                                                            |
|                 |        |       | NS5   | CAUAGGUGAGUCAUCAUCUAGUC        | -16.72 |                                                                                                                                                                                                                                                                                                                                                                                                                                                                            |
| aae-miR-305-5p  | CHIKV  | IOL   | nsP2  | AAUGCGCACUACGAAUGAGUACAA       | -14.17 | <ul style="list-style-type: none"> <li>Abundant in Aag2 cells and mosquitoes during the pupal stage<sup>29,90,92</sup></li> <li>Upregulated in salivary glands after CHIKV infection<sup>47</sup></li> <li>The expression switched to aae-miR-305-3p in response to DENV-2 infection<sup>25</sup></li> <li>Upregulated in the fat body of <i>Ae. aegypti</i> after blood meal<sup>95</sup></li> <li>Down regulated in response to DENV-2 infection<sup>31</sup></li> </ul> |
|                 |        |       | E1    | UGAUUACAUCACGUGCGAGUACAA       | -14.81 |                                                                                                                                                                                                                                                                                                                                                                                                                                                                            |
|                 |        | Asian | nsP2  | AAUGCGCACUACGAAUGAGUACAA       | -14.17 |                                                                                                                                                                                                                                                                                                                                                                                                                                                                            |
|                 |        | ECSA  | nsP2  | AAUGCGCACUACGAAUGAGUACAA       | -14.17 |                                                                                                                                                                                                                                                                                                                                                                                                                                                                            |
|                 | DENV-3 | III   | E     | AUACUCAUUAAGGUUGAGUACAA        | -11.67 |                                                                                                                                                                                                                                                                                                                                                                                                                                                                            |
|                 | DENV-4 | I     | NS1   | CGUGCACACUUGGACAGAACAGUACAA    | -16.46 |                                                                                                                                                                                                                                                                                                                                                                                                                                                                            |
|                 |        |       | NS5   | GGAAGGAGUUUGAAGAGUACAA         | -14.83 |                                                                                                                                                                                                                                                                                                                                                                                                                                                                            |
|                 |        |       | NS5   | CACAUUCACCAACAUGGAAGUACAA      | -17.17 |                                                                                                                                                                                                                                                                                                                                                                                                                                                                            |
|                 |        | II    | NS1   | CGUGCACACUUGGACAGAACAGUACAA    | -16.46 |                                                                                                                                                                                                                                                                                                                                                                                                                                                                            |
|                 |        | III   | NS5   | CACAUUCACCAACAUGGAAGUACAA      | -17.17 |                                                                                                                                                                                                                                                                                                                                                                                                                                                                            |
|                 |        | IOL   | nsP1  | UCCCUUUGAGGACUAGAAUCAAA        | -11.73 |                                                                                                                                                                                                                                                                                                                                                                                                                                                                            |
|                 |        |       | nsP4  | AAAAUUUGCGUGCAAUCAAG           | -12.55 |                                                                                                                                                                                                                                                                                                                                                                                                                                                                            |
| aae-miR-315-5p  | CHIKV  | IOL   | nsP1  | UCCCUUUGAGGACUAGAAUCAAA        | -11.73 | <ul style="list-style-type: none"> <li>Induced by Palm Creek virus (PCV) infection at 6 days post-infection<sup>30</sup></li> <li>Potentially targets the 3'UTR of the juvenile hormone-regulated</li> </ul>                                                                                                                                                                                                                                                               |
|                 |        | WA    | nsP4  | AAAAUUUGCGUGCAAUCAAG           | -12.55 |                                                                                                                                                                                                                                                                                                                                                                                                                                                                            |

|                |        |                |        |                         |        |                                                                                                                                                             |
|----------------|--------|----------------|--------|-------------------------|--------|-------------------------------------------------------------------------------------------------------------------------------------------------------------|
|                |        | ECSA           | nsP1   | UCCCGUUGAGGACUAGAAUCAAA | -11.13 | serine protease (JHA15) and AaArgM3 <sup>96,97</sup>                                                                                                        |
|                | DENV-1 | IV             | NS5    | ACCAAUUGAGCAAAUCAGA     | -16.2  |                                                                                                                                                             |
|                | DENV-2 | Asian-I        | Capsid | GGGAACAAUUAAAAAUCAAA    | -11.23 |                                                                                                                                                             |
|                |        | Asian-II       | NS5    | AUCCAAACAGCAAUAAAUCAAG  | -11.95 |                                                                                                                                                             |
|                |        | American       | NS5    | UAGUUCCAUGCAGAAAUCAAG   | -13.29 |                                                                                                                                                             |
|                |        | Cosmopolitan   | NS5    | AUCCAAACAGCAAUAAAUCAAG  | -11.95 |                                                                                                                                                             |
|                | ZIKV   | EA             | Capsid | CCAUGUUGAGAAUAAUCAAU    | -14.27 |                                                                                                                                                             |
|                |        | WA             | 2K     | AUCUCCCCAGGAUAAUCAAA    | -9.35  |                                                                                                                                                             |
| aae-miR-316-5p | CHIKV  | IOL            | nsP1   | GCCCGGGACGCAGAAAAAGAA   | -13.83 | <ul style="list-style-type: none"><li>Detectable in the fat body<sup>95</sup></li><li>Upregulated in midgut, 24 hrs after blood meal<sup>91</sup></li></ul> |
|                | DENV-1 | I              | Capsid | GAACAACCAACGGAAAAAGAC   | -20.34 |                                                                                                                                                             |
|                |        |                | NS5    | AUGGGAAAAGUGAGGAAAGAC   | -19.3  |                                                                                                                                                             |
|                |        | II             | NS3    | GGCCAGUGUCAAAAAAGAC     | -14.4  |                                                                                                                                                             |
|                |        |                | NS3    | AUCCAAGAUGAGGAAAGAGAC   | -18    |                                                                                                                                                             |
|                |        |                | NS5    | AUGGGAAAAGUAAGAAAAGAC   | -17.89 |                                                                                                                                                             |
|                |        | III            | Capsid | GAACAACCAACGGAAGAAGAC   | -20.48 |                                                                                                                                                             |
|                |        |                | NS5    | UGGGAGAAAAUUGGAAAAGAC   | -19.12 |                                                                                                                                                             |
|                |        |                | NS5    | AUGGGAAAAGUGAGAAAAGAC   | -19.68 |                                                                                                                                                             |
|                |        | IV             | Capsid | GAACAACCAACGGAAAAAGAC   | -20.34 |                                                                                                                                                             |
|                |        | V              | Capsid | GAACAACCAACGGAAAAAGAC   | -20.34 |                                                                                                                                                             |
|                |        |                | NS5    | AUGGGAAAAGUAAGAAAAGAC   | -17.89 |                                                                                                                                                             |
|                | DENV-2 | Asian-I        | Capsid | GAAUAACCAACGAAAAAGGC    | -19.59 |                                                                                                                                                             |
|                |        |                | NS5    | AAGAAUUAGGGAAGAAAAAGAC  | -13.98 |                                                                                                                                                             |
|                |        | Asian-II       | Capsid | GAAUAACCAACGAAAAAGGC    | -19.59 |                                                                                                                                                             |
|                |        |                | Capsid | GAAUAACCAACGAAAAAGGC    | -19.59 |                                                                                                                                                             |
|                |        | Asian American | NS1    | UGUCAGCAGCCAUAAAAGAC    | -15.36 |                                                                                                                                                             |
|                |        |                | Capsid | GAAUAACCAACGAAAAAGGC    | -19.59 |                                                                                                                                                             |
|                |        | American       | NS5    | AAGAACUAGGAAAGAAAAAGAC  | -15.04 |                                                                                                                                                             |
|                |        |                | NS5    | CAACAUGAUGGGAAAAAGAG    | -13.52 |                                                                                                                                                             |
|                |        | Cosmopolitan   | Capsid | GAAUAACCAACGAAAAAGGC    | -19.59 |                                                                                                                                                             |

|  |               |        |              |                       |                          |                                                                                                                                                                                                                                                                                                                                                                                                                                                                                                                            |
|--|---------------|--------|--------------|-----------------------|--------------------------|----------------------------------------------------------------------------------------------------------------------------------------------------------------------------------------------------------------------------------------------------------------------------------------------------------------------------------------------------------------------------------------------------------------------------------------------------------------------------------------------------------------------------|
|  |               |        | NS1          | UGUCAGCAGCCAUAAAAGAC  | -15.36                   | <ul style="list-style-type: none"> <li>Upregulated in response to CHIKV infection<sup>53</sup></li> <li>Detectable during all the developmental stages, but the expression level was relatively low during the pupal stage<sup>90</sup></li> <li>The expression of this miRNA was correlated with the nutritional status of adults and can be suppressed in the midgut when adults are starved<sup>98</sup></li> <li>Increased in the abundance of 5' Trim isomiRs in response to DENV-2 infection<sup>99</sup></li> </ul> |
|  |               |        | NS4A         | UCUUGAUGAGCGGAAAAGGC  | -20.74                   |                                                                                                                                                                                                                                                                                                                                                                                                                                                                                                                            |
|  |               | I      | Capsid       | GAACAACCAACGAAAAAGAC  | -20.34                   |                                                                                                                                                                                                                                                                                                                                                                                                                                                                                                                            |
|  |               |        | NS3          | UGACACAGAAUAUCAAAGAC  | -8.61                    |                                                                                                                                                                                                                                                                                                                                                                                                                                                                                                                            |
|  |               | II     | Capsid       | GAACAACCAACGAAAAAGAC  | -13.47                   |                                                                                                                                                                                                                                                                                                                                                                                                                                                                                                                            |
|  |               |        | Capsid       | UAUCAACAAAAGGAAAAAGAC | -17.7                    |                                                                                                                                                                                                                                                                                                                                                                                                                                                                                                                            |
|  |               | III    | Capsid       | GAACAACCAACGGAAGAAGAC | -20.48                   |                                                                                                                                                                                                                                                                                                                                                                                                                                                                                                                            |
|  |               |        | Capsid       | AAUCAACCAACGAAAAAGAC  | -20.4                    |                                                                                                                                                                                                                                                                                                                                                                                                                                                                                                                            |
|  |               | V      | Capsid       | GAACAACCAACGAAAAAGAC  | -20.34                   |                                                                                                                                                                                                                                                                                                                                                                                                                                                                                                                            |
|  |               |        | Capsid       | UAUCAACAAACGAAAAAGAC  | -20.4                    |                                                                                                                                                                                                                                                                                                                                                                                                                                                                                                                            |
|  |               | DENV-4 | I            | NS5                   | GAACAGAGUGUGGAUAGAAGAC   | -21.5                                                                                                                                                                                                                                                                                                                                                                                                                                                                                                                      |
|  |               |        | II           | NS5                   | GAACAGAGUGUGGAUAGAAGAC   | -21.5                                                                                                                                                                                                                                                                                                                                                                                                                                                                                                                      |
|  |               | ZIKV   | EA           | NS5                   | AGUCCUGAAGUGGAAGAGAC     | -18.52                                                                                                                                                                                                                                                                                                                                                                                                                                                                                                                     |
|  | aac-miR-34-3p | CHIKV  | IOL          | nsP1                  | CAUGCCGCUGUGAUACAGUGGUU  | -14.18                                                                                                                                                                                                                                                                                                                                                                                                                                                                                                                     |
|  |               |        |              | nsP1                  | GCUGAACCAGAGAAUAGUGGUU   | -14.74                                                                                                                                                                                                                                                                                                                                                                                                                                                                                                                     |
|  |               |        | WA           | nsP4                  | GUCCAAAGGCUGAAGGGUGGUU   | -19.31                                                                                                                                                                                                                                                                                                                                                                                                                                                                                                                     |
|  |               |        |              | nsP1                  | CAUGCCGCUGUGACACAGUGGUU  | -14.18                                                                                                                                                                                                                                                                                                                                                                                                                                                                                                                     |
|  |               |        | Asian        | nsP1                  | GCUGAACCAGAGAAUAGUGGUU   | -14.74                                                                                                                                                                                                                                                                                                                                                                                                                                                                                                                     |
|  |               |        |              | nsP1                  | GCUGAACCAGAGAAUAGUGGUU   | -14.74                                                                                                                                                                                                                                                                                                                                                                                                                                                                                                                     |
|  |               | DENV-1 | ECSA         | nsP1                  | CAUGCCGCUGUGAUACAGUGGUU  | -14.18                                                                                                                                                                                                                                                                                                                                                                                                                                                                                                                     |
|  |               |        |              | nsP1                  | GCUGAACCAGAGAAUAGUGGUU   | -14.74                                                                                                                                                                                                                                                                                                                                                                                                                                                                                                                     |
|  |               |        | I            | 3'UTR                 | CAUGGGGUAGCAGACUAGUGGUU  | -20.16                                                                                                                                                                                                                                                                                                                                                                                                                                                                                                                     |
|  |               | DENV-2 | III          | 3'UTR                 | CAUGGGGUAGCAGACUAGUGGUU  | -20.16                                                                                                                                                                                                                                                                                                                                                                                                                                                                                                                     |
|  |               |        | IV           | 3'UTR                 | CAUGGGGUAGCAGACUAGUGGUU  | -20.16                                                                                                                                                                                                                                                                                                                                                                                                                                                                                                                     |
|  |               |        | Asian-I      | NS2A                  | AGACCUAGGAAGAGUGGUGGUU   | -16.15                                                                                                                                                                                                                                                                                                                                                                                                                                                                                                                     |
|  |               | DENV-3 | Cosmopolitan | NS5                   | UCAUCCAUGGUGAACGGAGUGGUU | -18.17                                                                                                                                                                                                                                                                                                                                                                                                                                                                                                                     |
|  |               |        | I            | prM                   | UUCCUUGACCCAGAAAGUGGUU   | -10.1                                                                                                                                                                                                                                                                                                                                                                                                                                                                                                                      |
|  |               |        |              | 3'UTR                 | CACGGUGUAGCAGACUAGUGGUU  | -20.21                                                                                                                                                                                                                                                                                                                                                                                                                                                                                                                     |
|  |               |        | II           | prM                   | UUCCCUGACCCAGAAAGUGGUU   | -10.1                                                                                                                                                                                                                                                                                                                                                                                                                                                                                                                      |
|  |               |        |              | NS3                   | GACUGUAUGGCAAUGGAGUGGUU  | -19.15                                                                                                                                                                                                                                                                                                                                                                                                                                                                                                                     |

|                |        |     |        |                         |        |                                                                                                |
|----------------|--------|-----|--------|-------------------------|--------|------------------------------------------------------------------------------------------------|
|                |        | III | NS3    | GACUGUAUGGCAAUGGAGUGGUU | -19.15 |                                                                                                |
|                |        |     | prM    | UUCCUUGACCCAGAAAGUGGUU  | -10.1  |                                                                                                |
|                |        | V   | NS3    | GACUGUAUGGCAAUGGAGUGGUU | -19.15 |                                                                                                |
|                |        |     | 3'UTR  | CACGGUGUAGCAGACUAGUGGUU | -20.21 |                                                                                                |
|                | DENV-4 | I   | E      | GUGAACAAGGAAAAAGUGGUU   | -17.78 |                                                                                                |
|                |        |     | E      | GAACCUUGAAUACACAGUGGUU  | -13.34 |                                                                                                |
|                |        | III | E      | UGUGAACAAAGAAAAAGUGGUU  | -14.92 |                                                                                                |
|                |        |     | NS5    | CAAAACUAGGCACACGAGUGGUU | -15.39 |                                                                                                |
|                | ZIKV   | WA  | 3'UTR  | UCCAGCAGAAGGACUAGUGGUU  | -20.97 |                                                                                                |
|                |        |     | Asian  | CCCAGAAGAGGGACUAGUGGUU  | -17.3  |                                                                                                |
|                |        | EA  | E      | GUUGGUGCACAAAGAGUGGUU   | -13.53 |                                                                                                |
|                |        |     | 3'UTR  | UCCAGCAGAGGGACUAGUGGUU  | -21.41 |                                                                                                |
| aae-miR-79-3p  | DENV-1 | I   | NS4A   | AAACGUUAAUGCUCUAGCUUU   | -13.74 | <ul style="list-style-type: none"> <li>Relatively low expression level<sup>91</sup></li> </ul> |
|                |        | III | NS4A   | AAACAUUGAUGCUCUAGCUUU   | -13.75 |                                                                                                |
|                |        | IV  | 2K     | CAUAUGUGGUGAUAGCUUU     | -15.19 |                                                                                                |
|                |        | V   | NS4A   | AAACAUUGAUGCUCUAGCUUU   | -16.32 |                                                                                                |
|                | DENV-3 | I   | Capsid | UGGUCAUGGCGUUCAUAGCUUU  | -11.8  |                                                                                                |
|                |        | II  | Capsid | UGGUUAUGGCGUUCAUAGCUUU  | -14    |                                                                                                |
|                |        | III | Capsid | UGGUUAUGGCGUUCAUAGCUUU  | -14    |                                                                                                |
|                |        | V   | Capsid | UGGUUAUGGCGUUUAUAGCUUU  | -12.3  |                                                                                                |
| aae-miR-92a-3p | DENV-4 | II  | prM    | AGAGAAGCGCUCAGUAGCUUU   | -11.81 | <ul style="list-style-type: none"> <li>The expression profile is not clear</li> </ul>          |
|                | DENV-1 | I   | NS5    | GCAAAAGGAAGUCGUGCAAU    | -13.7  |                                                                                                |
|                |        | II  | NS5    | GCAAAAGGAAGUCGUGCAAU    | -13.7  |                                                                                                |
|                |        | III | NS5    | GCAAAAGGAAGUCGUGCAAU    | -13.7  |                                                                                                |
|                |        | V   | NS5    | GCAAAAGGAAGUCGUGCAAU    | -13.7  |                                                                                                |
|                | DENV-3 | I   | prM    | ACCUACGGAACGUGCAAU      | -13.85 |                                                                                                |
|                |        | II  | prM    | GACUUAUGGAACGUGCAAU     | -11.68 |                                                                                                |
|                |        | III | prM    | GACUUAUGGAACGUGCAAU     | -11.68 |                                                                                                |
|                |        |     | E      | AAUAGAGGGAAAAGUGGUGCAAU | -19.35 |                                                                                                |



|      |        |         |                          |                          |        |                                                                                                                                                                                                                                                                                                                                                                                      |
|------|--------|---------|--------------------------|--------------------------|--------|--------------------------------------------------------------------------------------------------------------------------------------------------------------------------------------------------------------------------------------------------------------------------------------------------------------------------------------------------------------------------------------|
| a    | DENV-1 | I       | NS5                      | GGCAAAAAGGAAGUCGUGCAAU   | -14.72 | <ul style="list-style-type: none"><li>The expression profile is not clear</li></ul>                                                                                                                                                                                                                                                                                                  |
|      |        | II      | NS5                      | GGCAAAAAGGAAGUCGUGCAAU   | -14.72 |                                                                                                                                                                                                                                                                                                                                                                                      |
|      |        | III     | NS5                      | GGCAAAAAGGAAGUCGUGCAAU   | -14.72 |                                                                                                                                                                                                                                                                                                                                                                                      |
|      |        | V       | NS5                      | GGCAAAAAGGAAGUCGUGCAAU   | -14.72 |                                                                                                                                                                                                                                                                                                                                                                                      |
|      | DENV-2 | Asian-I | NS3                      | UGGAGCAUAUGUGAGUGCAAU    | -12.57 |                                                                                                                                                                                                                                                                                                                                                                                      |
|      | DENV-3 | I       | prM                      | GACCUACGGAACGUGCAAU      | -14.11 |                                                                                                                                                                                                                                                                                                                                                                                      |
|      |        | II      | prM                      | UGACUUAUGGAACGUGCAAU     | -12.13 |                                                                                                                                                                                                                                                                                                                                                                                      |
|      |        | III     | prM                      | UGACUUAUGGAACGUGCAAU     | -12.13 |                                                                                                                                                                                                                                                                                                                                                                                      |
|      |        |         | E                        | CAAUAGAGGGAAAAGUGGUGCAAU | -17.65 |                                                                                                                                                                                                                                                                                                                                                                                      |
|      | DENV-4 | II      | NS2B                     | GAAGGCCGCUAGUGUGCAAU     | -20.74 |                                                                                                                                                                                                                                                                                                                                                                                      |
| ZIKV | WA     | NS5     | AAAGCAAAAAGGCAGCCGUGCAAU | -14.29                   |        |                                                                                                                                                                                                                                                                                                                                                                                      |
| a    | CHIKV  | IOL     | nsP4                     | CAACACAUUGUUAACAUCAC     | -15.2  | <ul style="list-style-type: none"><li>Down regulated in response to CHIKV infection in <i>Ae. aegypti</i> Aag2 cells<sup>53</sup></li><li>Up regulated in response to ZIKV infection at 2 and 14 days post-infection<sup>29</sup></li><li>Down regulated in <i>Wolbachia</i>-infected mosquitoes<sup>100</sup></li><li>The most abundant miRNA in the ovaries<sup>94</sup></li></ul> |
|      |        | WA      | nsP4                     | AAUACACUGCUAAACAUCAC     | -18.88 |                                                                                                                                                                                                                                                                                                                                                                                      |
|      |        |         | E1                       | CUGUCACUUGACUACAUCAC     | -20.31 |                                                                                                                                                                                                                                                                                                                                                                                      |
|      |        | ECSA    | nsP4                     | CAACACACUGCUAAAUAUCAC    | -17.71 |                                                                                                                                                                                                                                                                                                                                                                                      |
|      | DENV-1 | II      | NS5                      | UCUAGAUUACAUGACAUCAA     | -11.96 |                                                                                                                                                                                                                                                                                                                                                                                      |
|      |        | III     | NS5                      | UUUAGACUACAUGACAUCAA     | -14.18 |                                                                                                                                                                                                                                                                                                                                                                                      |
|      |        |         | NS4B                     | CUGAUACUUUGUACAUCAC      | -18.69 |                                                                                                                                                                                                                                                                                                                                                                                      |
|      |        | V       | NS4B                     | CUGAUACUUUGUACAUCAC      | -18.69 |                                                                                                                                                                                                                                                                                                                                                                                      |
|      | ZIKV   | Asian   | NS2B                     | GAAAGAGCAGGUGACAUCAC     | -15    |                                                                                                                                                                                                                                                                                                                                                                                      |
|      |        | EA      | NS2B                     | GAAAGAGCAGGUGACAUCAC     | -15    |                                                                                                                                                                                                                                                                                                                                                                                      |
| a    | CHIKV  | IOL     | E1                       | GAGUACCGUAUAAGACUCUAGUC  | -15.27 | <ul style="list-style-type: none"><li>The most abundant miRNA in embryos<sup>94</sup></li></ul>                                                                                                                                                                                                                                                                                      |
|      |        | Asian   | E1                       | GAGUACCGUAUAAGACUCUAGUC  | -15.27 |                                                                                                                                                                                                                                                                                                                                                                                      |
|      |        | ECSA    | E1                       | GAGUACCGUAUAAGACUCUAGUC  | -15.27 |                                                                                                                                                                                                                                                                                                                                                                                      |
|      | DENV-1 | III     | NS1                      | GAGAAGGAAGAGAAUCUAGUC    | -16.47 |                                                                                                                                                                                                                                                                                                                                                                                      |
|      | ZIKV   | Asian   | NS5                      | GGUGAGUCAUCAUCUAGUC      | -18.33 |                                                                                                                                                                                                                                                                                                                                                                                      |
|      |        | EA      | NS5                      | GGUGAGUCAUCAUCUAGUC      | -18.33 |                                                                                                                                                                                                                                                                                                                                                                                      |
| a    | CHIKV  | WA      | E1                       | CCUUAUUUUAAUUGUGGUGCU    | -16.67 | <ul style="list-style-type: none"><li>Detectable during all the developmental stages<sup>91</sup></li></ul>                                                                                                                                                                                                                                                                          |
|      | DENV-1 | I       | 3'UTR                    | AGAAAAUGGAAUGGUGCU       | -15.16 |                                                                                                                                                                                                                                                                                                                                                                                      |

|                  |               |                |       |                         |                         |                                                                                                                                                                                                                                 |
|------------------|---------------|----------------|-------|-------------------------|-------------------------|---------------------------------------------------------------------------------------------------------------------------------------------------------------------------------------------------------------------------------|
|                  |               | III            | 3'UTR | AGAAAAUGGAAUGGUGCU      | -15.16                  |                                                                                                                                                                                                                                 |
|                  |               | IV             | 3'UTR | AGAAAAUGGAAUGGUGCU      | -15.16                  |                                                                                                                                                                                                                                 |
|                  |               | V              | E     | CUUUA AUGAGAUGGUGCU     | -16.04                  |                                                                                                                                                                                                                                 |
|                  |               |                | 3'UTR | AGAAAAUGGAAUGGUGCU      | -15.16                  |                                                                                                                                                                                                                                 |
|                  | DENV-2        | Asian-I        | 3'UTR | AGAAAAUGGAAUGGUGCU      | -15.16                  |                                                                                                                                                                                                                                 |
|                  |               | Asian-II       | 3'UTR | AGAAAAUGGAAUGGUGCU      | -15.16                  |                                                                                                                                                                                                                                 |
|                  |               | Asian American | 3'UTR | AGAAAAUGGAAUGGUGCU      | -15.16                  |                                                                                                                                                                                                                                 |
|                  |               | Cosmopolitan   | 3'UTR | AGAAAAUGGAAUGGUGCU      | -15.16                  |                                                                                                                                                                                                                                 |
|                  | DENV-3        | I              | 3'UTR | AGAAAAUGGAAUGGUGCU      | -15.16                  |                                                                                                                                                                                                                                 |
|                  |               | II             | NS3   | CAGAUAGAAAAUGGUGCU      | -13.96                  |                                                                                                                                                                                                                                 |
|                  |               |                | 3'UTR | AGAAAAUGGAAUGGUGCU      | -15.16                  |                                                                                                                                                                                                                                 |
|                  |               | III            | NS3   | CAGAUAGAAAAUGGUGCU      | -13.96                  |                                                                                                                                                                                                                                 |
|                  |               |                | 3'UTR | AGAAAAUGGAAUGGUGCU      | -15.16                  |                                                                                                                                                                                                                                 |
|                  |               | V              | NS3   | CAGAUAGAAAAUGGUGCU      | -13.96                  |                                                                                                                                                                                                                                 |
|                  |               |                | 3'UTR | AGAAAAUGGAAUGGUGCU      | -15.16                  |                                                                                                                                                                                                                                 |
|                  | aac-miR-9c-5p | Asian-I        | NS5   | AUCAUAUCGAGAAGAGACCAAAG | -16.48                  | <ul style="list-style-type: none"><li>Down regulated in DENV-2 infected mosquitoes at 9 days post-infection<sup>31</sup></li><li>Down regulated in the fat body of mosquitoes at 24 hrs after blood meal<sup>95</sup></li></ul> |
|                  |               | Asian-II       | NS5   | AUCAUAUCGAGAAGAGACCAAAG | -16.48                  |                                                                                                                                                                                                                                 |
|                  |               | Asian American | NS5   | AUCAUAUCGAGAAGAGACCAAAG | -16.48                  |                                                                                                                                                                                                                                 |
|                  |               | American       | NS5   | CAUAUCGAGAAAAGACCAAAG   | -13.98                  |                                                                                                                                                                                                                                 |
|                  |               | Cosmopolitan   | NS5   | AUUAUAUCGAGAAGAGACCAAAG | -18.63                  |                                                                                                                                                                                                                                 |
|                  |               | DENV-4         | I     | 3'UTR                   | UCACCAACAAAAACACCAAAG   | -11.81                                                                                                                                                                                                                          |
|                  |               |                | II    | 3'UTR                   | CCAACAACAAACACCAAAG     | -11.47                                                                                                                                                                                                                          |
|                  |               |                | III   | Capsid                  | GGGACAGUUGAAGAAAACCAAGG | -19.29                                                                                                                                                                                                                          |
|                  |               |                |       | NS5                     | AUCAUAUCCAGGAAAGACCAAAG | -14.95                                                                                                                                                                                                                          |
|                  |               | ZIKV           | Asian | NS5                     | AUUUUUUCGAGACAAGACCAAAG | -14.59                                                                                                                                                                                                                          |
| aac-miR-iab-4-5p | CHIKV         | IOL            | nsP1  | CCAUAUGGAUCCUGUGUACG    | -16.87                  | <ul style="list-style-type: none"><li>Arm switched from 5' to 3' in response to DENV-2 infection<sup>25</sup></li></ul>                                                                                                         |
|                  |               |                | 3'UTR | GAAAAUACAUAUUAGGUAUACG  | -16.31                  |                                                                                                                                                                                                                                 |
|                  |               | WA             | 3'UTR | AAAUCAUAUAAACAGGUAUACG  | -12.6                   |                                                                                                                                                                                                                                 |
|                  |               | ECSA           | nsP1  | CCAUAUGGAUCCUGUGUACG    | -16.87                  |                                                                                                                                                                                                                                 |

|              |        |                |       |                         |        |                                                                                                                                                           |
|--------------|--------|----------------|-------|-------------------------|--------|-----------------------------------------------------------------------------------------------------------------------------------------------------------|
|              |        |                | 3'UTR | GAAAAAUACAUAUUAGGUAUACG | -16.31 |                                                                                                                                                           |
|              | DENV-2 | Asian-II       | prM   | UGAAGAUACAAUCACGUUAAAG  | -15.14 |                                                                                                                                                           |
| aae-miR-new8 | CHIKV  | IOL            | nsP1  | GGCAGGUCACACCGAAUGACCA  | -10.63 | <ul style="list-style-type: none"><li>Detectable in the very early stages of embryo development and decreases during embryogenesis<sup>90</sup></li></ul> |
|              |        | WA             | nsP1  | GGCAGGUCACACCGAAUGACCA  | -10.63 |                                                                                                                                                           |
|              | DENV-1 | IV             | NS1   | UUUACUCAAGUGUGUGACCA    | -16.85 |                                                                                                                                                           |
|              |        |                | NS2A  | UGCAUGGAAGACAAUGGCCA    | -13.16 |                                                                                                                                                           |
|              | DENV-2 | Asian-I        | NS2A  | CCAAGGAAUUGAUGAUGACCA   | -10.42 |                                                                                                                                                           |
|              |        |                | NS3   | CCAAAAAUGAAAAUGACCA     | -15.73 |                                                                                                                                                           |
|              |        | Asian-II       | NS5   | ACAUCAUGGCACUAUGACCA    | -11.03 |                                                                                                                                                           |
|              |        | Asian American | NS3   | CCAAAAAUGAAAAUGACCA     | -15.73 |                                                                                                                                                           |
|              |        |                | NS5   | ACAUCAUGGCACUAUGACCA    | -11.03 |                                                                                                                                                           |
|              |        | Cosmopolitan   | NS3   | CCAAAAAUGAAAAUGACCA     | -15.73 |                                                                                                                                                           |
|              |        |                | NS5   | ACAUCAUGGCACUAUGACCA    | -11.03 |                                                                                                                                                           |
|              | DENV-3 | I              | NS3   | CCACAAAAAGAGAAUGACCA    | -16.53 |                                                                                                                                                           |
|              |        | II             | NS5   | UCACCAUCAGUGGAUGACCA    | -11.19 |                                                                                                                                                           |
|              |        | III            | NS3   | CCACAAAAAGAGAAUGACCA    | -21.12 |                                                                                                                                                           |
|              | DENV-4 | I              | NS5   | UACACGAGUAGUCAUGACCA    | -15.34 |                                                                                                                                                           |
|              |        | II             | NS2A  | CUAAUGGUAUAGGAAUGGCCA   | -12.48 |                                                                                                                                                           |
|              |        |                | NS5   | CACACGAAUGGUUAUGACCA    | -15.44 |                                                                                                                                                           |
|              |        |                | NS5   | CAUCACCAAUGGAUGACCA     | -10    |                                                                                                                                                           |
|              |        | III            | NS5   | CACACGAGUGGUUAUGACCA    | -15.44 |                                                                                                                                                           |
|              | ZIKV   | WA             | NS2A  | UUUGAAGAAGAGAAUGACCA    | -16.46 |                                                                                                                                                           |
|              |        | Asian          | NS2A  | GCUGAAGAAGAGAAUGACCA    | -16.46 |                                                                                                                                                           |
|              |        |                | NS5   | GGAAAGGGAGAAUGGAUGACCA  | -13.49 |                                                                                                                                                           |
|              |        | EA             | E     | GUGUUCUAAGAAGAUGACCG    | -18.86 |                                                                                                                                                           |
|              |        |                | NS2A  | GUUGAAGAAGAGAAUGACCA    | -16.46 |                                                                                                                                                           |
|              |        |                | NS5   | GGAAAGGGAGAAUGGAUGACCA  | -13.49 |                                                                                                                                                           |
